# Supplementary material
Source: PubMed Central journal article supplement (PMC4810030)

Supplemental Figure 1

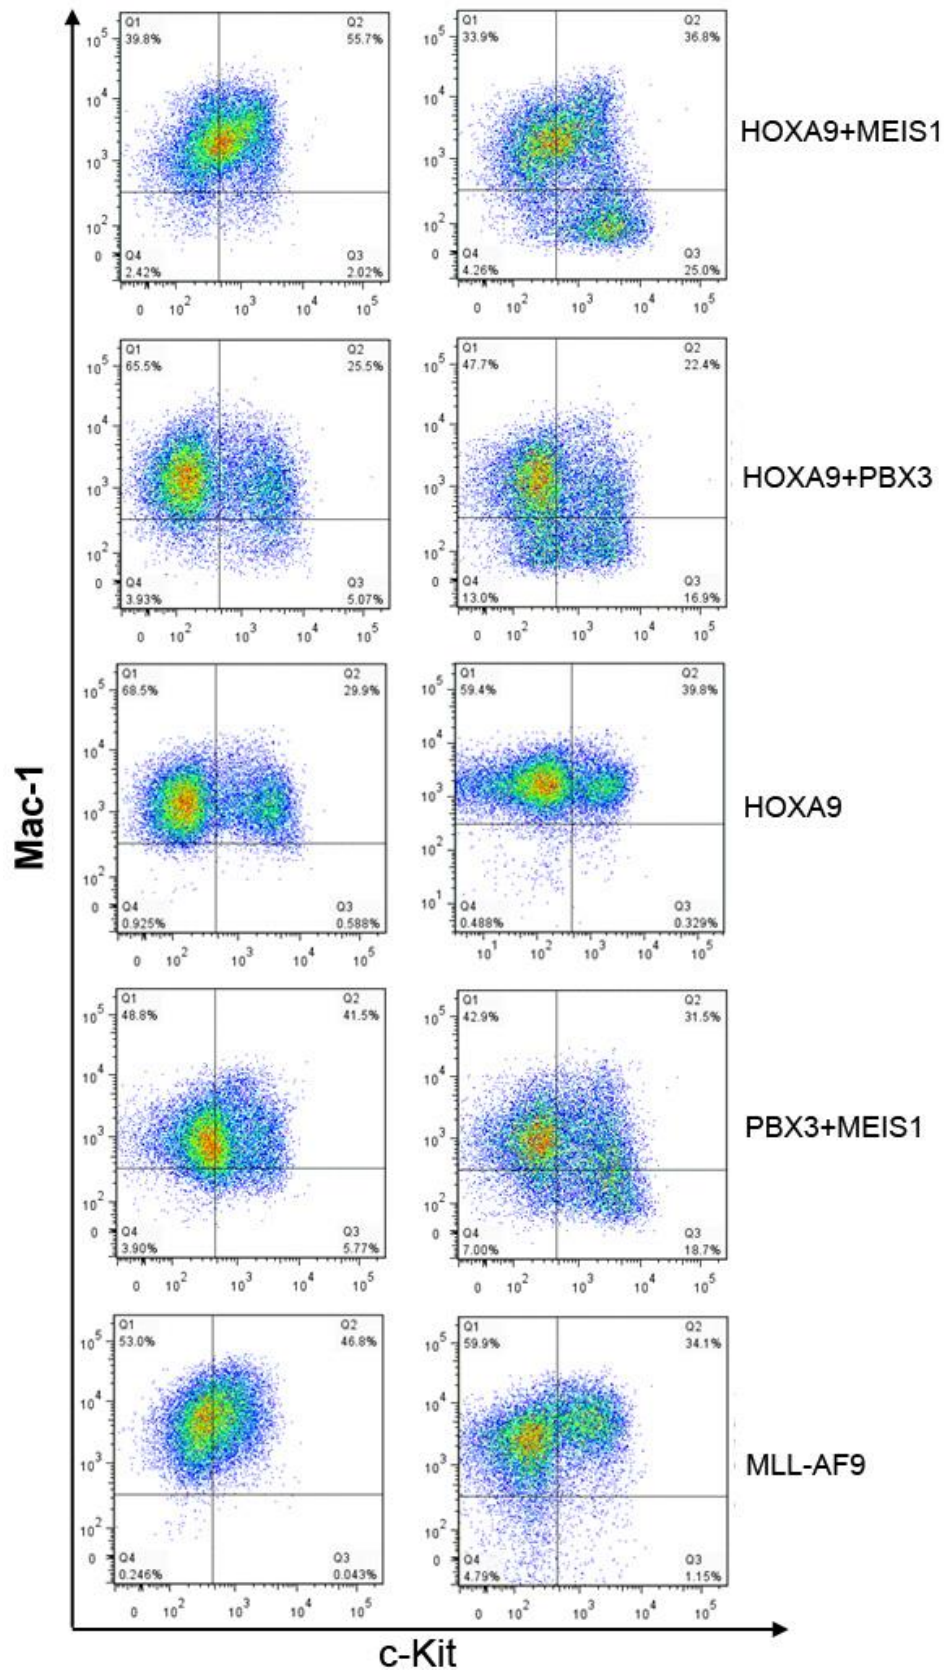

Supplemental Figure 2

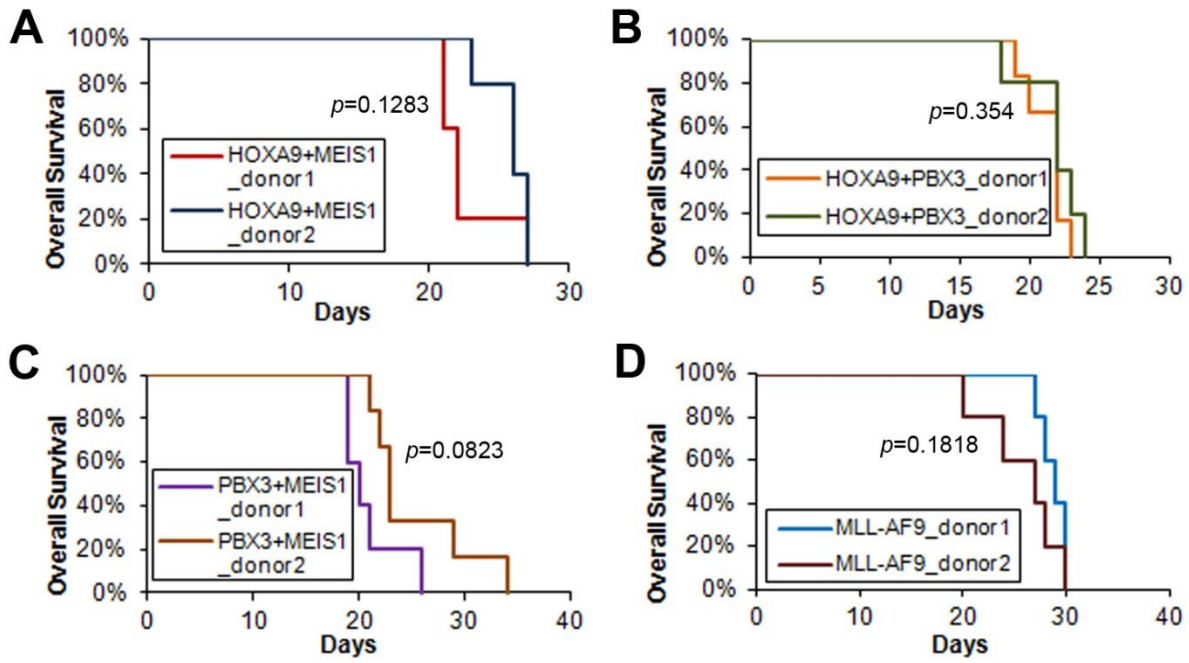

# Supplemental Figure 3

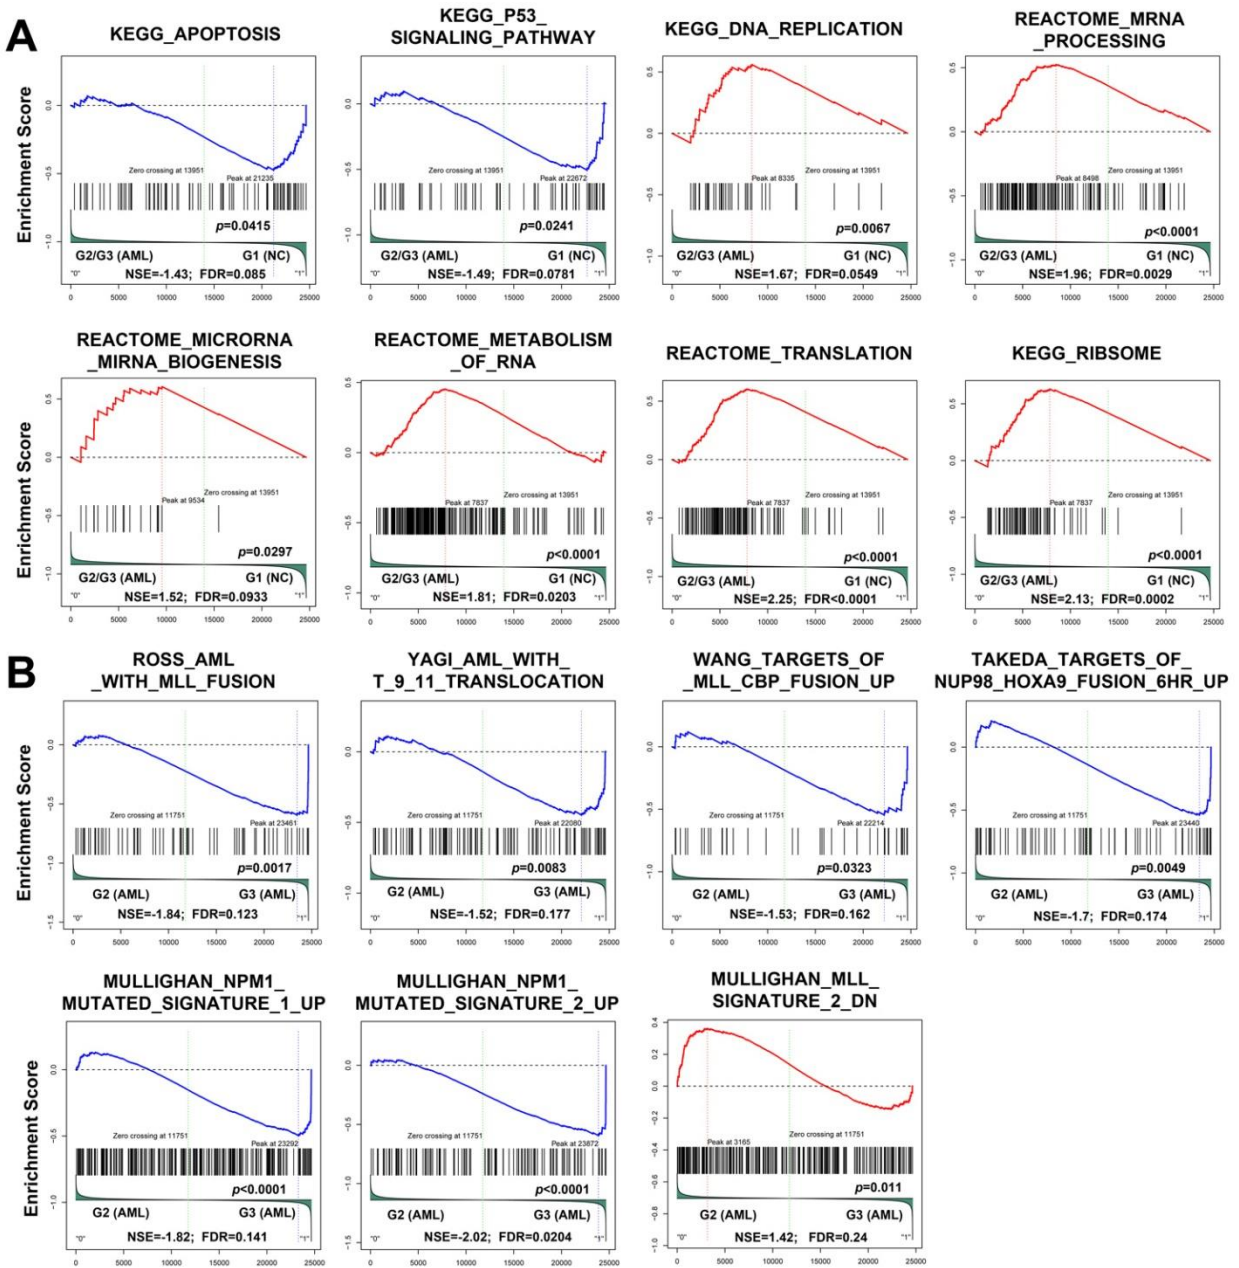

# Supplemental Figure 4

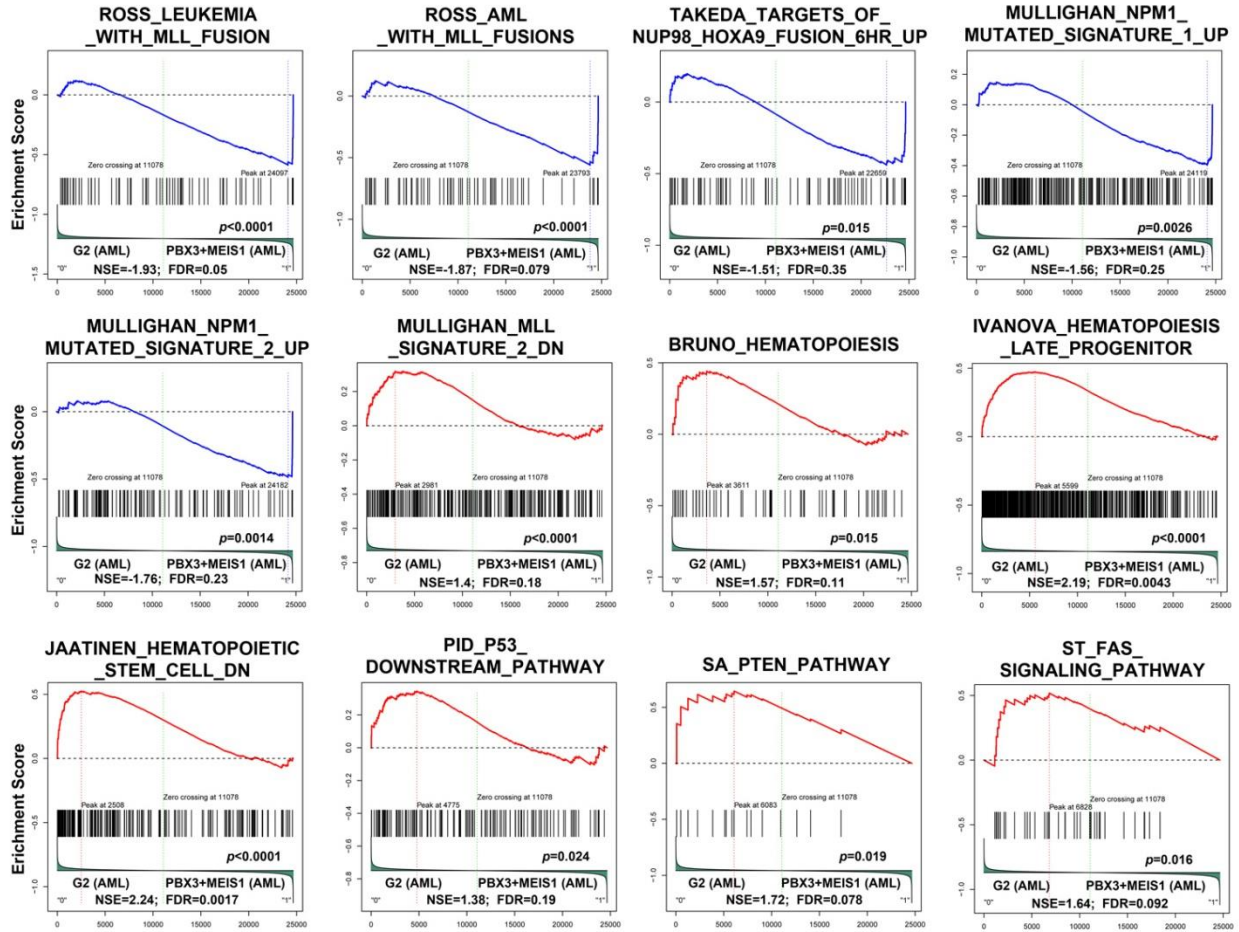

Supplemental Figure 5

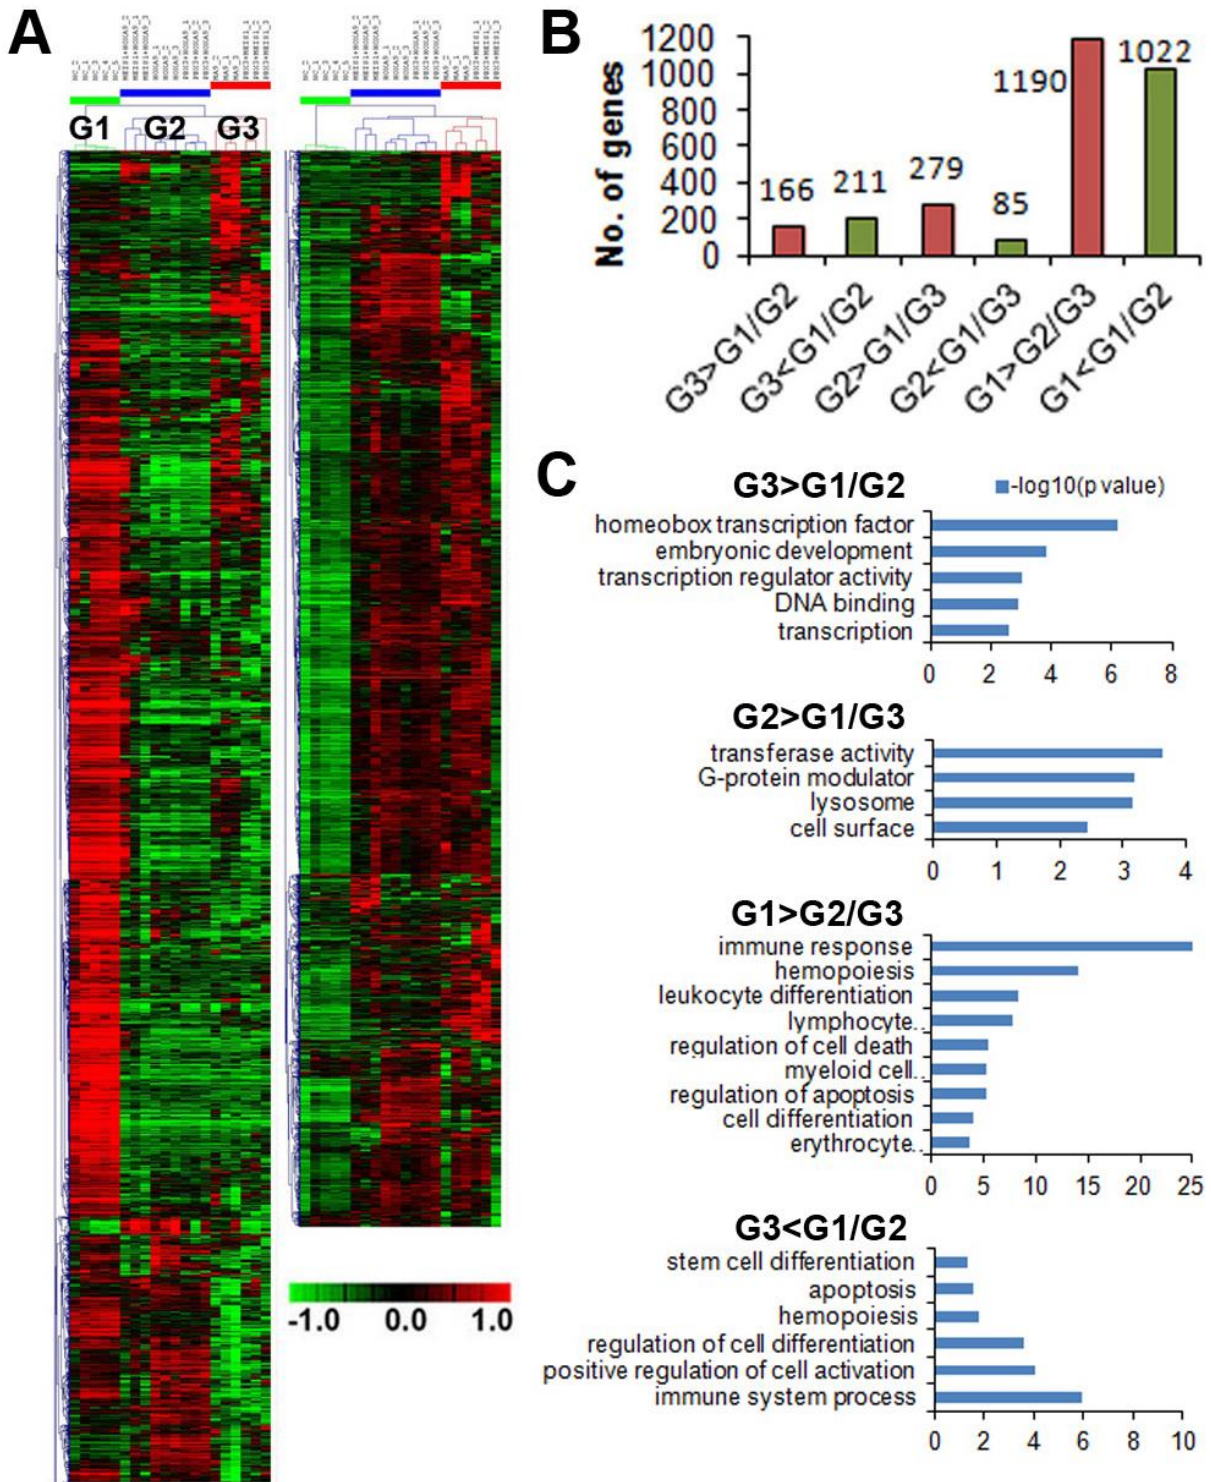

# Supplemental Figure 6

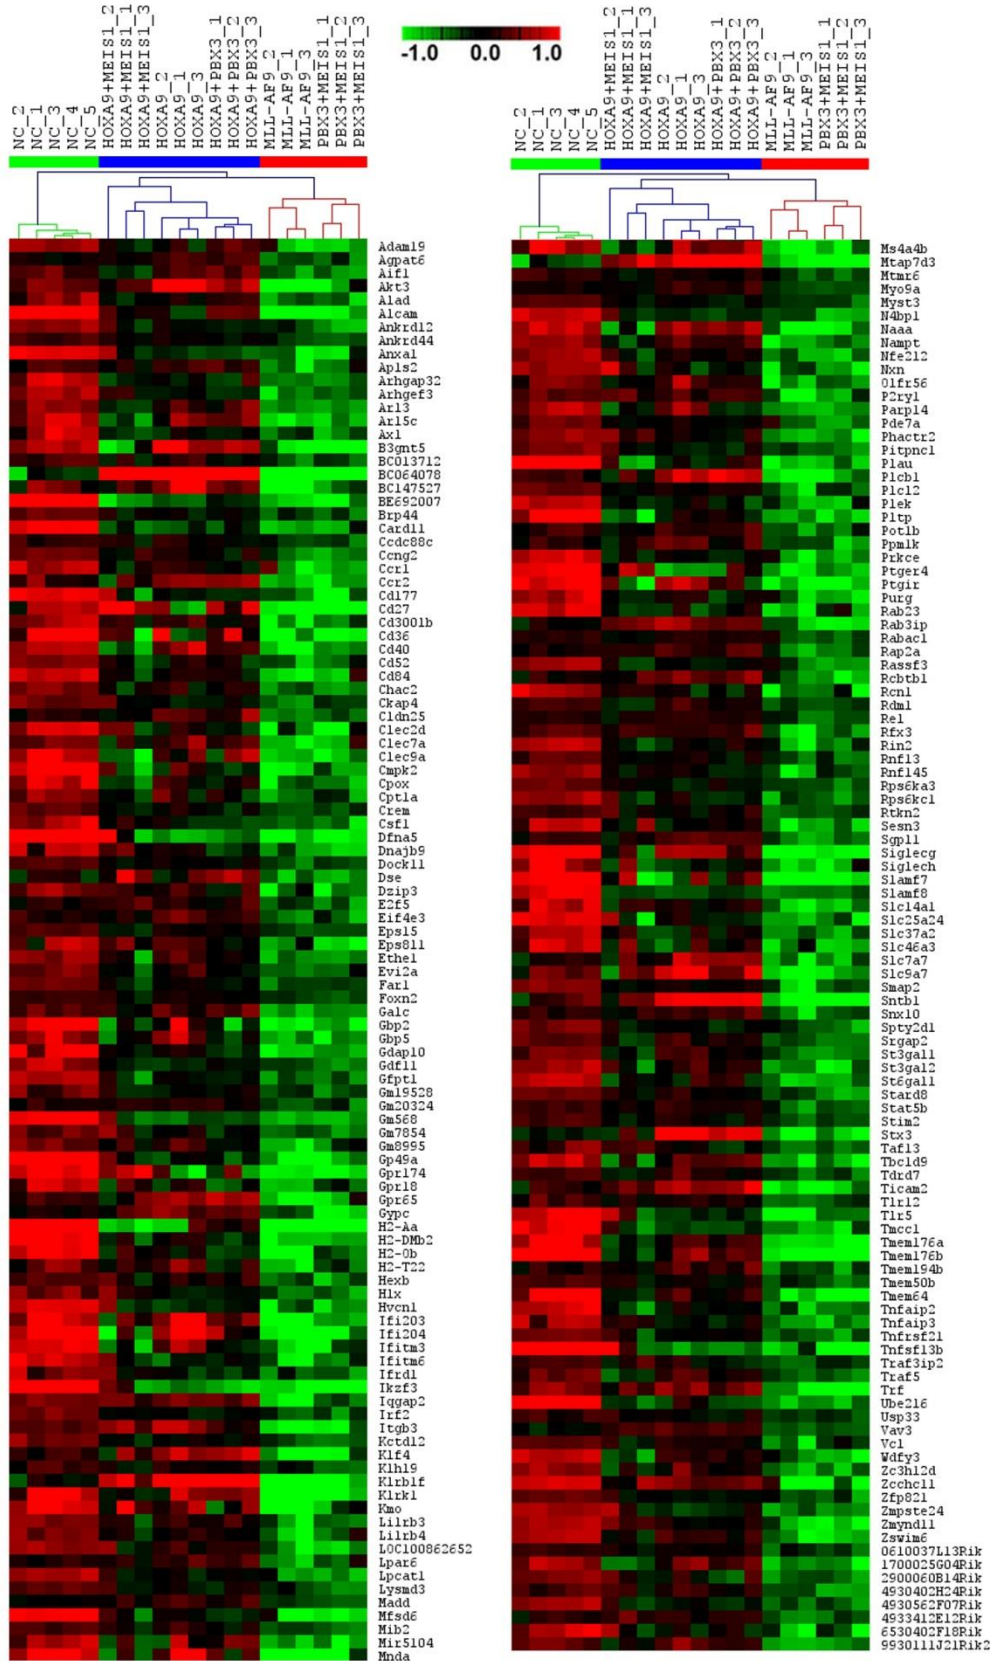

# Supplemental Figure 7

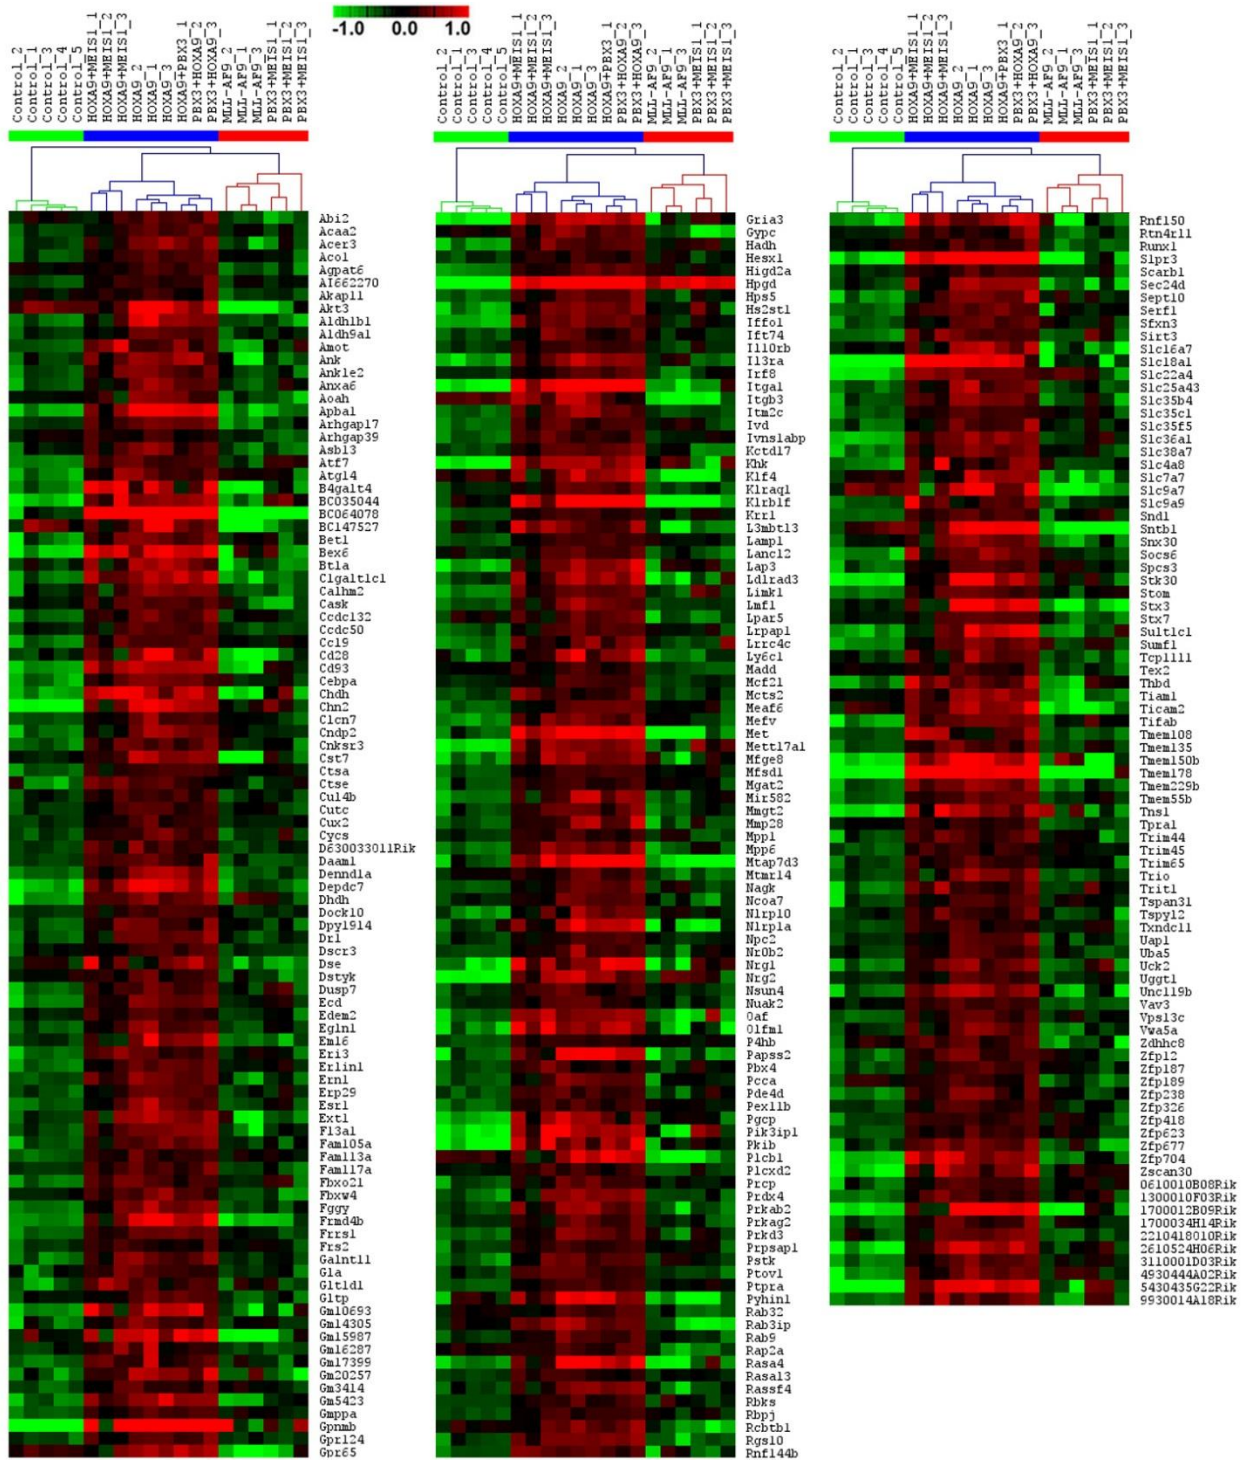

Supplemental Figure 8

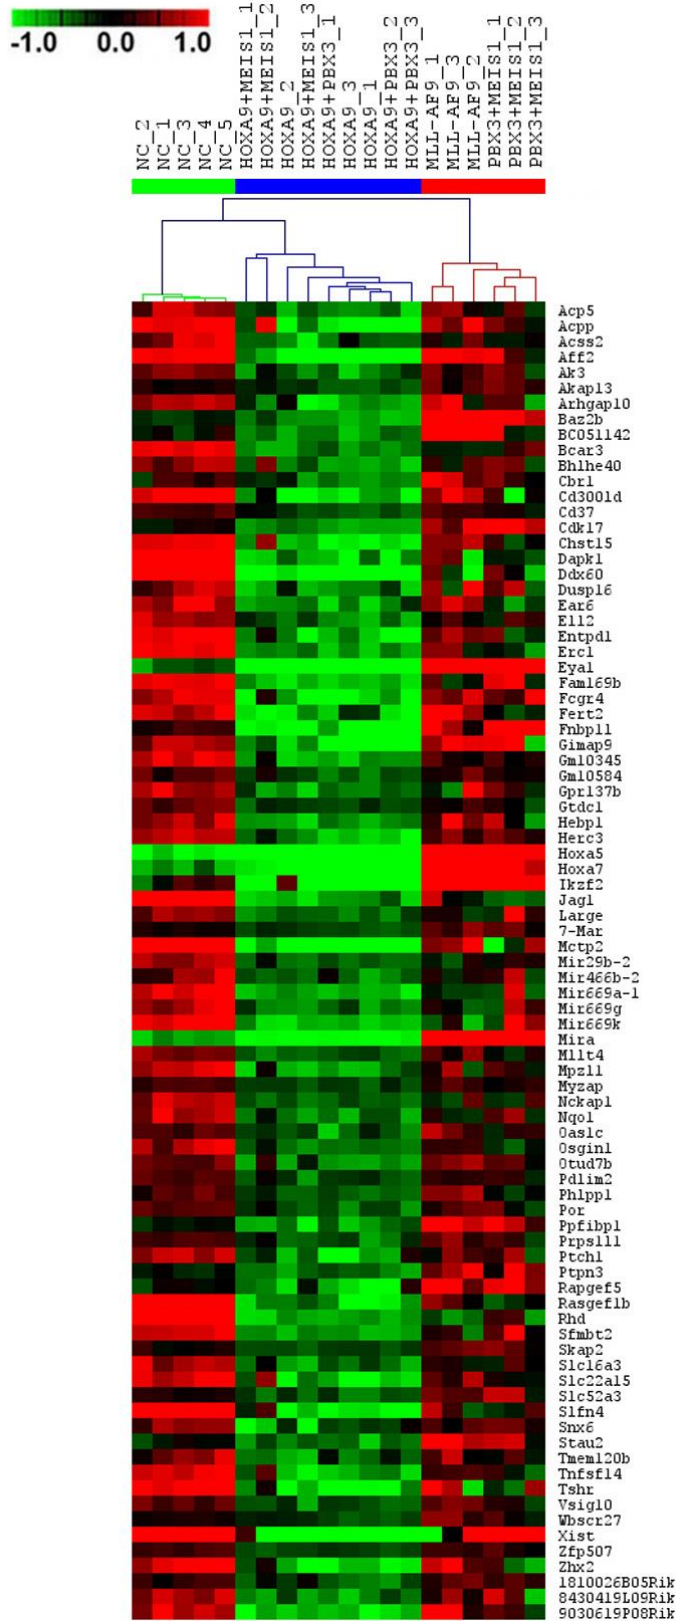





Supplemental Figure 10

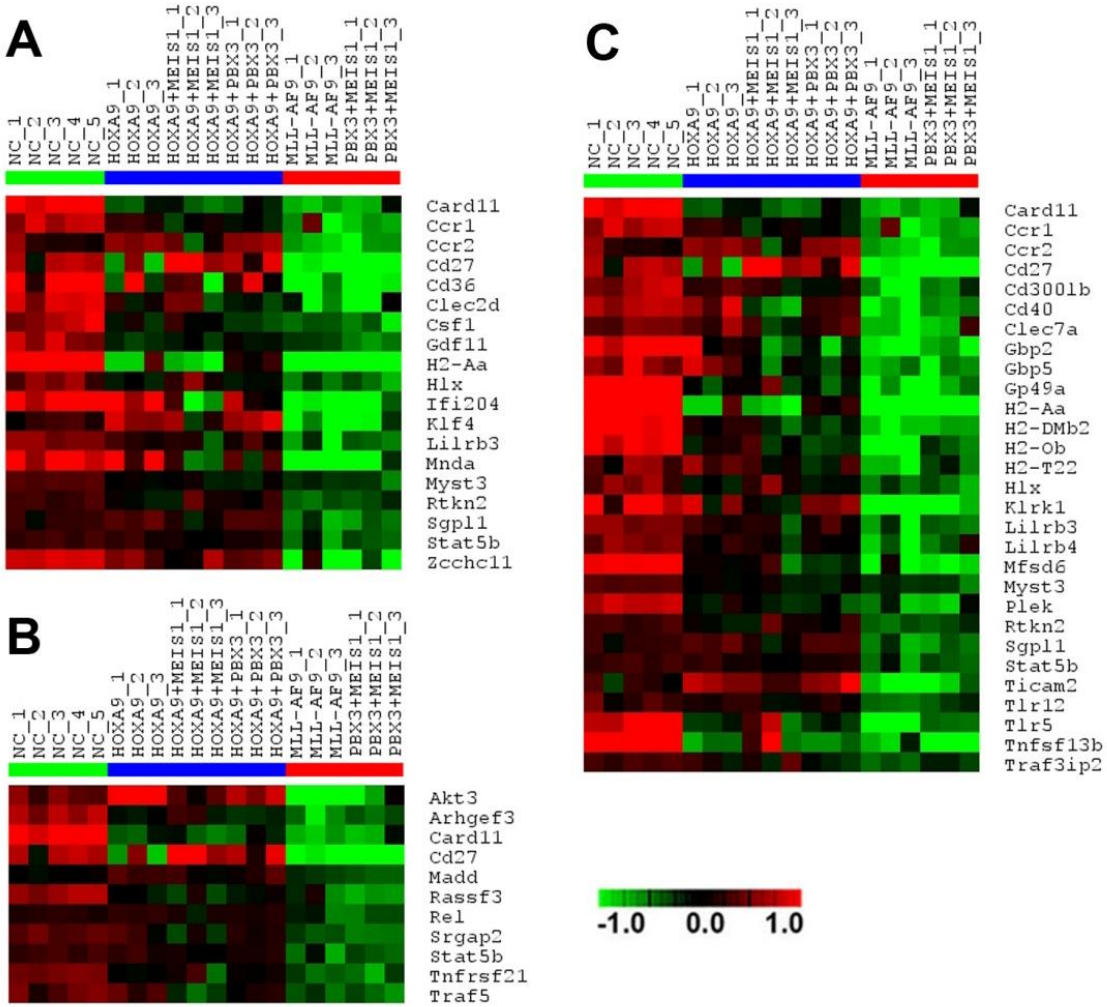

Supplemental Figure 11

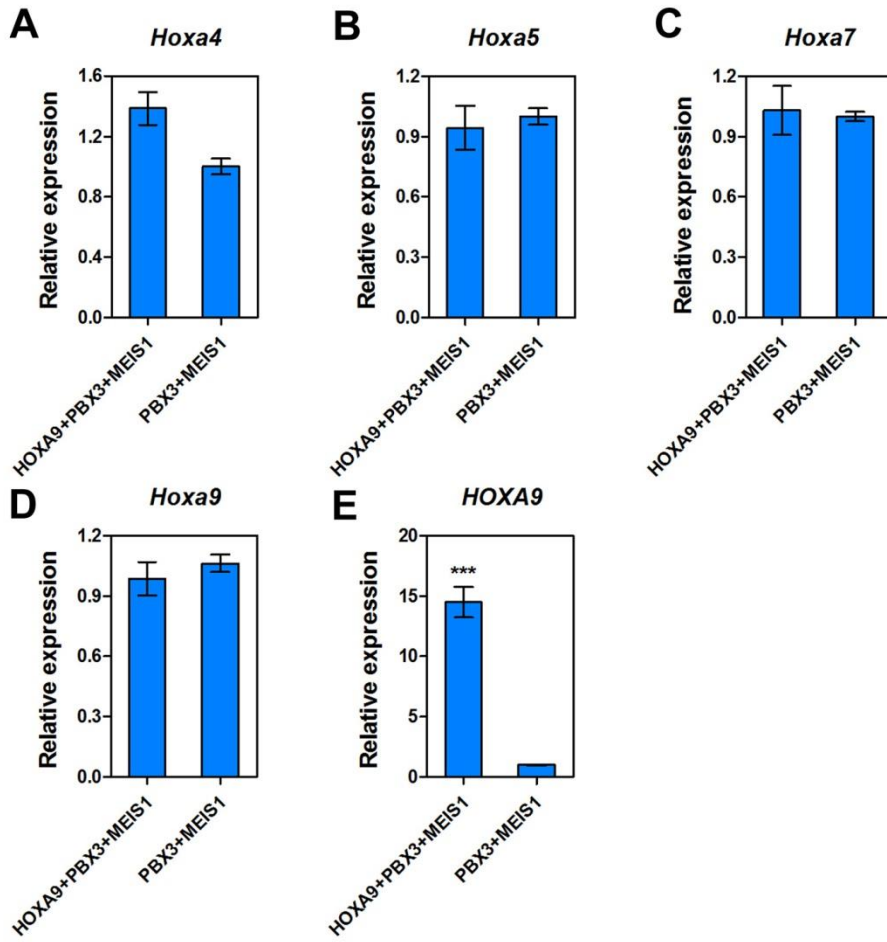

Supplement: NIHMS744585-supplement-4.pdf [file NIHMS744585-supplement-4.pdf]
